# Supplementary material for: Applications of RAFT polymerization for chemical and enzymatic stabilization of l-asparaginase conjugates with well-defined poly(HPMA)
Source: Royal Society of Chemistry journal article supplement (doi:10.1039/c9nj01211g), 2019-01-01
Supplement: c9nj01211g1.pdf [file c9nj01211g1.pdf]

ARTICLE

**Application of RAFT polymerization for chemical and enzymatic stabilization of L-asparaginase conjugates with well-defined poly(HPMA)**

Maryam Monajati<sup>a,b</sup>, Ali Mohammad Tamaddon<sup>b,c\*</sup>, Gholamhossein Yousefi<sup>b,c</sup>, Samira Sadat Abolmaali<sup>b,c</sup>,  
Rassoul Dinarvand<sup>a,d\*</sup>

a. Department of Pharmaceutical Nanotechnology, Faculty of Pharmacy, Tehran University of Medical Sciences, Tehran, Iran.

b. Center for Nanotechnology in Drug Delivery, Shiraz University of Medical Sciences, Shiraz 71345, Iran.

c. Department of Pharmaceutical Nanotechnology, School of Pharmacy, Shiraz University of Medical Sciences, Shiraz, Iran.

d. Nanotechnology Research Centre, Faculty of Pharmacy, Tehran University of Medical Sciences, Tehran 1417614411, Iran.

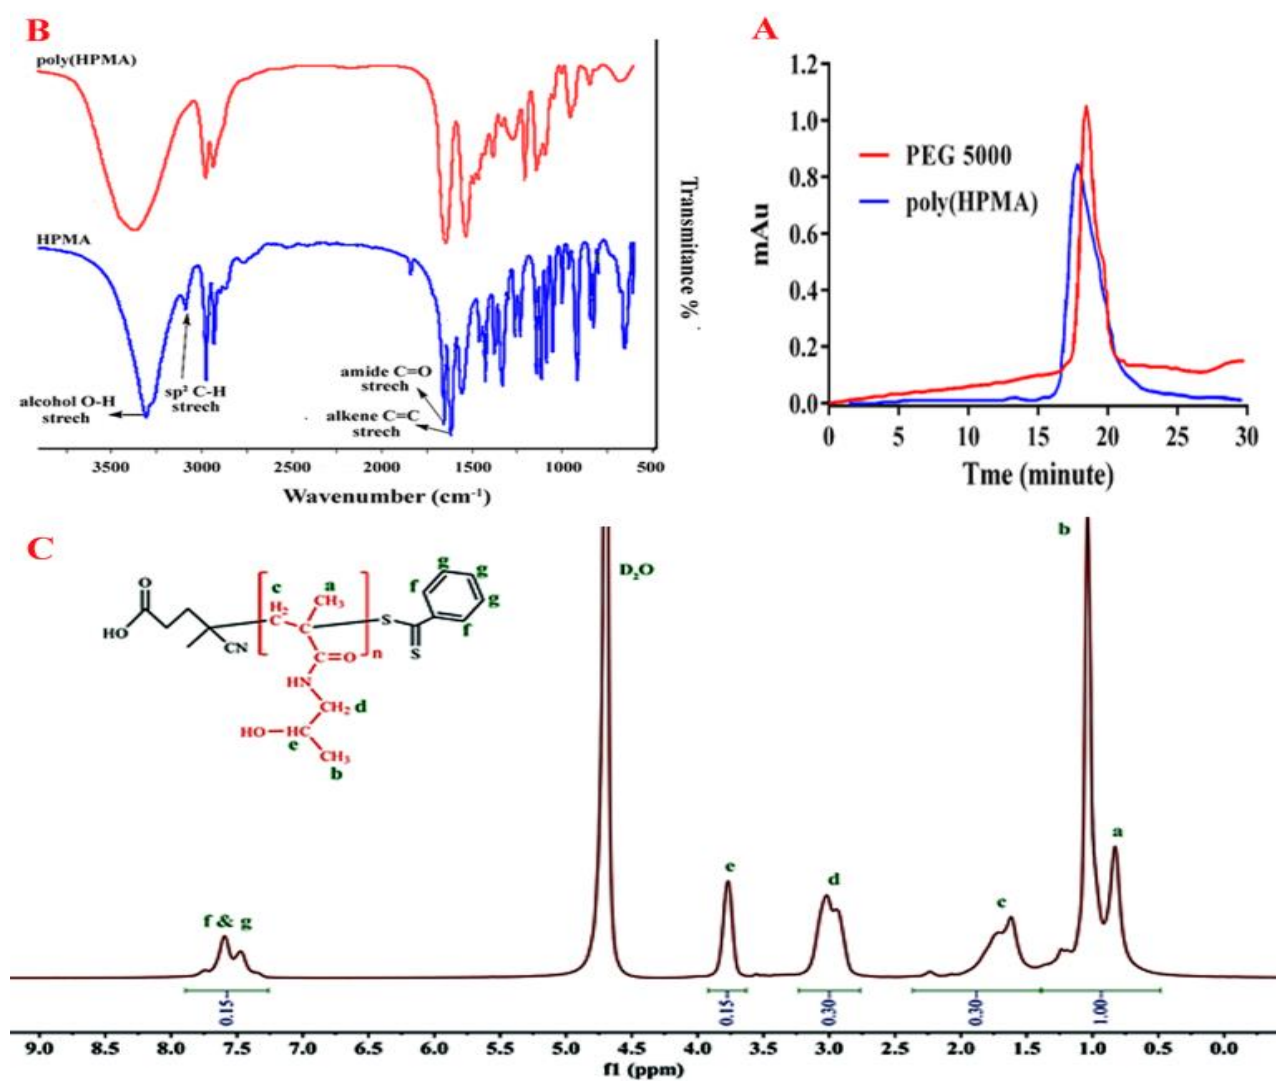

Fig. S 1. A) Size exclusion chromatography curve of poly(HPMA) and PEG(5 kDa), B) FTIR spectrum of poly(HPMA) and HPMA monomer, C)  $^1\text{H-NMR}$  spectrum of poly(HPMA) in  $\text{D}_2\text{O}$ .

R1.6.98.1r  
HPMA-DIC NHS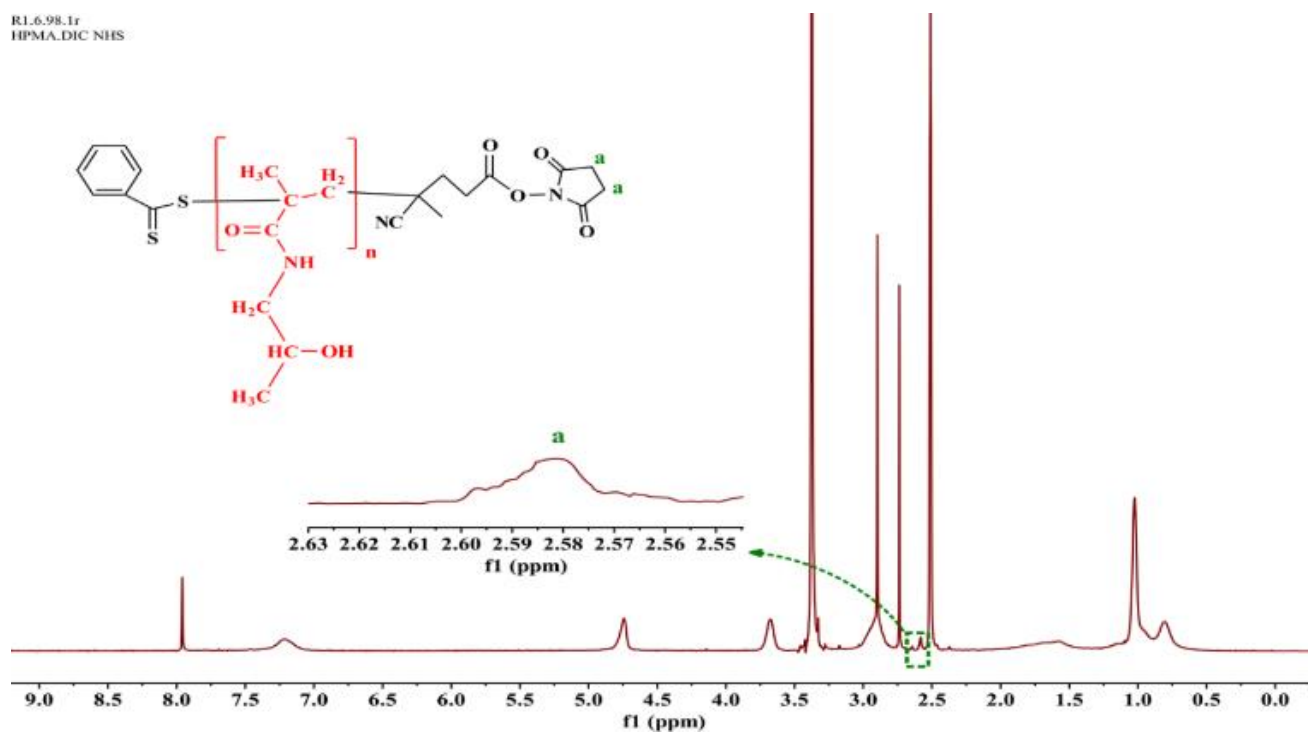Fig. S 2. <sup>1</sup>H-NMR spectrum of end poly(HPMA)-NHS in DMSO(d<sub>6</sub>)

R1.6.100.1r  
HPMA.SUC NHS 1.2

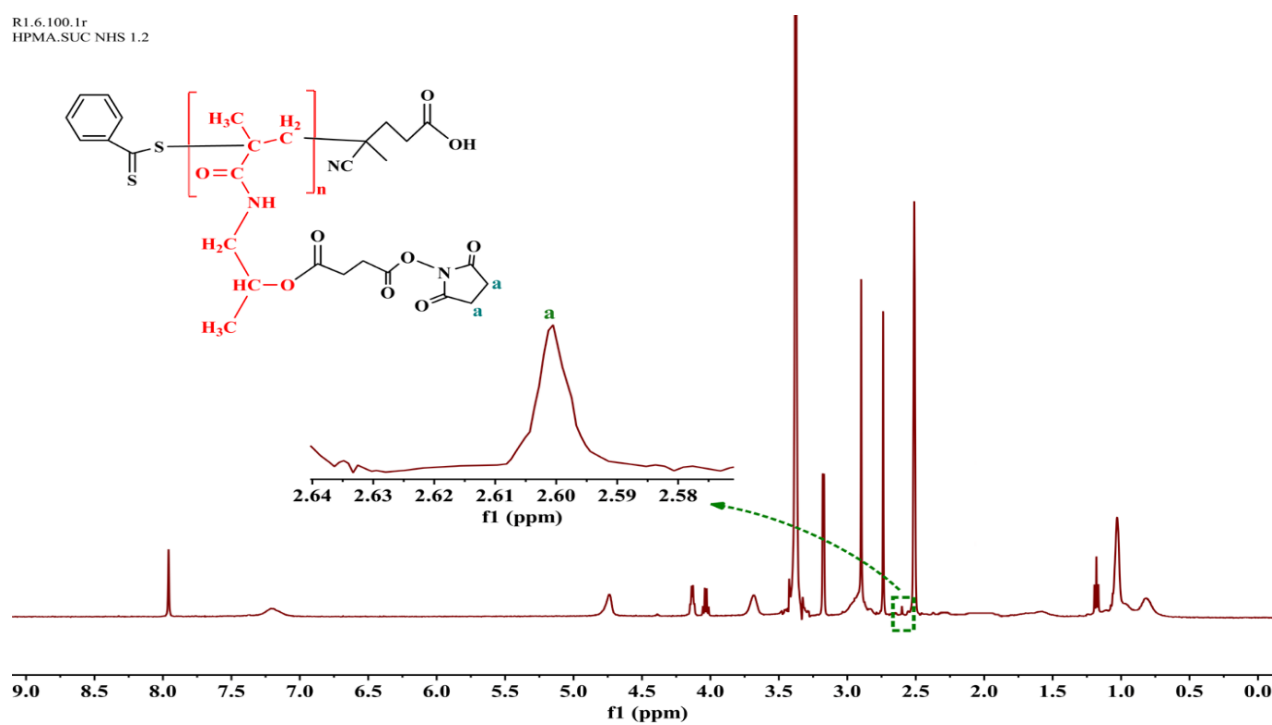

Fig. S 3. <sup>1</sup>H-NMR spectrum of poly (HPMA)-SUC1.5-NHS in DMSO(d<sub>6</sub>).

R1.6.102.1r  
HPMA.CDI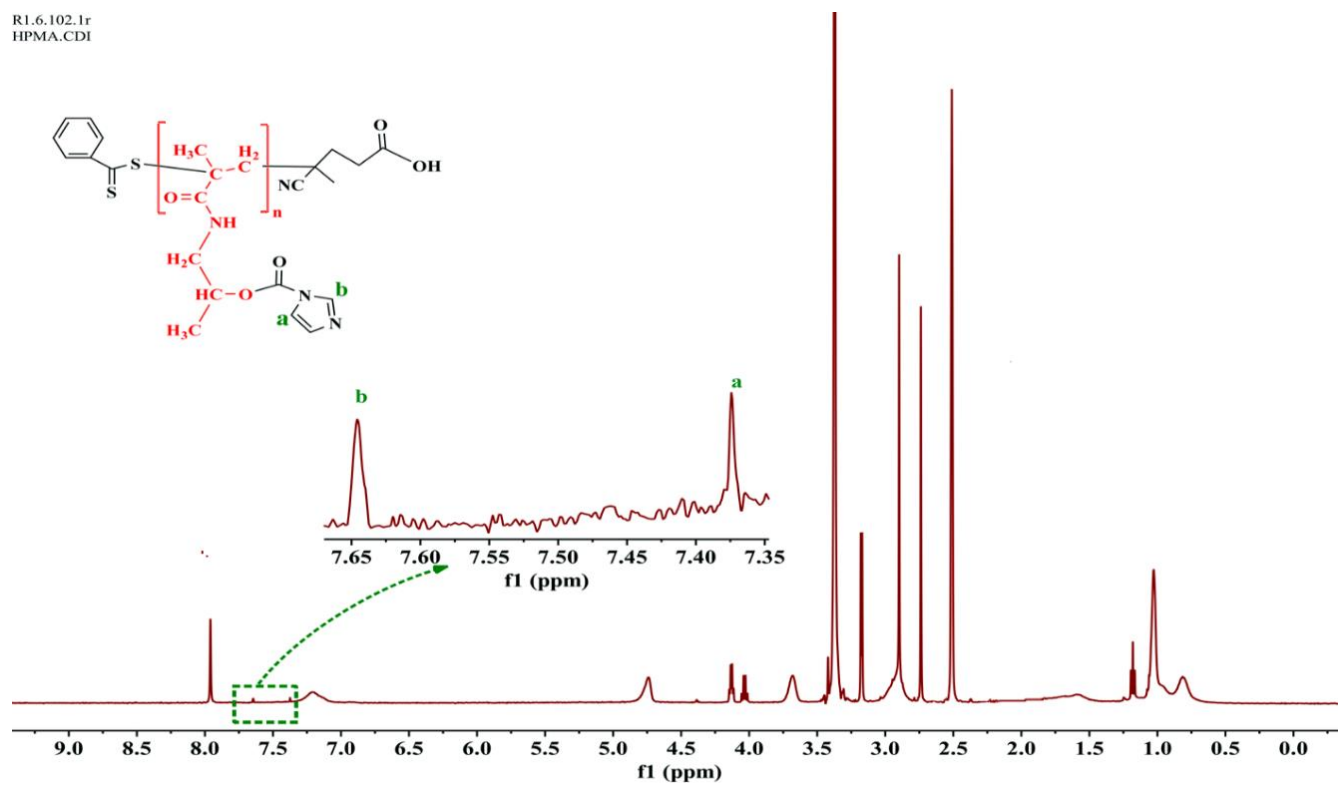Fig. S 4. <sup>1</sup>H-NMR spectrum of poly (HPMA)-CDI in DMSO(d<sub>6</sub>)
